# Supplementary material
Source: HighWire-hosted journal article supplement (https://erj.ersjournals.com/content/58/4/2102117)
Supplement: inline-supplementary-material-1 [file inline-supplementary-material-1.pdf]

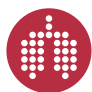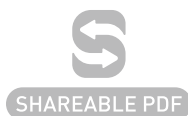

# The Cochrane review of electronic cigarettes for smoking cessation: remaining focused on the evidence

Caitlin Notley<sup>1</sup>, Ailsa R. Butler<sup>2</sup>, Nicola Lindson<sup>3</sup>, Chris Bullen<sup>4</sup>, Annika Theodoulou<sup>2</sup>, Rachna Begh<sup>2</sup>, Hayden McRobbie<sup>5,6</sup>, Peter Hajek<sup>7</sup>, Nancy Rigotti<sup>8</sup> and Jamie Hartman-Boyce<sup>3</sup>

<sup>1</sup>University of East Anglia, Medical School, Norwich, UK. <sup>2</sup>University of Oxford, Oxford, UK. <sup>3</sup>University of Oxford, Medical Sciences Division, Nuffield Dept of Primary Care Health Sciences, Oxford, UK. <sup>4</sup>University of Auckland, Auckland, New Zealand. <sup>5</sup>University of New South Wales, National Drug and Alcohol Research Centre, Sydney, Australia. <sup>6</sup>Lakes District Health Board, Rotorua, New Zealand. <sup>7</sup>Wolfson Institute of Preventive Medicine, London, UK. <sup>8</sup>Harvard Medical School, MGH Tobacco Research and Treatment Center, Boston, MA, USA.

Caitlin Notley (C.Notley@uea.ac.uk)

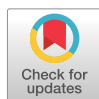

Shareable abstract (@ERSpublications)

**Evaluating new and emerging technologies for helping more people who smoke to quit is vital. The authors respond to a previous commentary on the Cochrane review, presenting the evidence using gold standard Cochrane methods.** <https://bit.ly/3xDcv8B>

**Cite this article as:** Notley C, Butler AR, Lindson N, *et al.* The Cochrane review of electronic cigarettes for smoking cessation: remaining focused on the evidence. *Eur Respir J* 2021; 58: 2102117 [DOI: 10.1183/13993003.02117-2021].

This single-page version can be shared freely online.

Copyright ©The authors 2021. For reproduction rights and permissions contact [permissions@ersnet.org](mailto:permissions@ersnet.org)

Received: 29 July 2021  
Accepted: 05 Aug 2021

*Reply to C. Pisinger and J. Vestbo:*

We are grateful for the opportunity to reply to the commentary on our Cochrane review of electronic cigarettes (EC) for smoking cessation [1] posed by PISINGER and VESTBO [2] with subsequent commentary by McALINDEN *et al.* [3].
